# Supplementary material
Source: publisher figshare collection journal article supplement (https://sage.figshare.com/ndownloader/files/17282528)
Supplement: Supplementary file 1 [file 17282528]

# **Appendix 5: Presence of radiolucent lines in glenoid zones at 48 months**

| <b>Presence of Radiolucent Lines</b> |             |                  |
|--------------------------------------|-------------|------------------|
| <b>Zone</b>                          | <b>None</b> | <b>&gt;1.0mm</b> |
| 1                                    | 108 (83.1%) | 22 (16.9%)       |
| 2                                    | 117 (90.0%) | 13 (10%)         |
| 3                                    | 103 (79.2%) | 27 (20.8%)       |
| 4                                    | 116 (89.2%) | 14 (10.8%)       |
| 5                                    | 101 (77.7%) | 29 (22.3%)       |
| 6 dorsal                             | 112 (86.2%) | 18 (13.8%)       |
| 6 ventral                            | 113 (86.9%) | 17 (13.1%)       |
| 7                                    | 124 (95.4%) | 6 (4.6%)         |
